# Supplementary material for: The Anti-Virulence Effect of Vismia guianensis against Candida albicans and Candida glabrata
Source: MDPI journal article supplement (doi:10.3390/antibiotics11121834), 2022-12-16
Supplement: s1 [file s1]

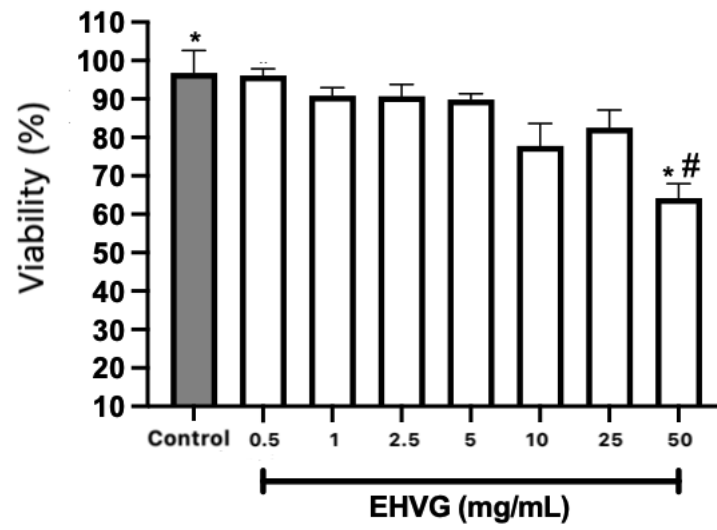

**Figure S1.** Effect of different concentrations of the hydroalcoholic leaf extract of *Vismia guianensis* (EHVG) on RAW 264.7 cells viability tested by neutral red assay. Medium was used as negative control. Data represent the mean  $\pm$  standard deviation of individual samples tested in quadruplicate. (\*)  $p < 0.05$  compared to the control; (#)  $p < 0.05$  compared to EHVG 0.5mg/mL.
